# Supplementary material for: Intranasal Infection of Ferrets with SARS-CoV-2 as a Model for Asymptomatic Human Infection
Source: MDPI journal article supplement (doi:10.3390/v13010113), 2021-01-15
Supplement: s1 [file s1]

Supplementary Materials: Figure S1 and S2

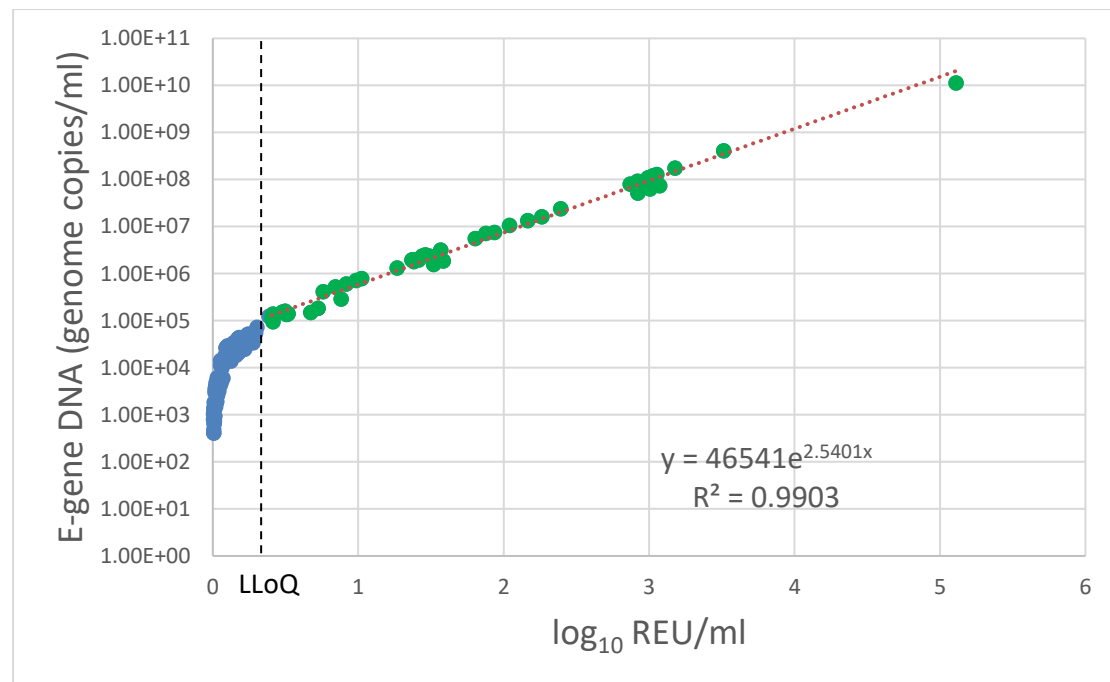

**Figure S1. Real-time RT-qPCR quantification.** Relative Equivalent units (REU) were calculated for a ten-fold dilution series of RNA extracted from a SARS-CoV-2/Australia/VIC01/2020 stock of known titre ( $\log_{10}$  TCID<sub>50</sub>/ml). REU values showed good correlation with the SARS-CoV-2 E gene DNA quantification standard (genome copies). The lower limit of quantification (LLoQ) for the assay is 0.4  $\log_{10}$  REU or approximately  $1 \times 10^5$  genome copies/ml. The graph shows the results of five independent assays.

a

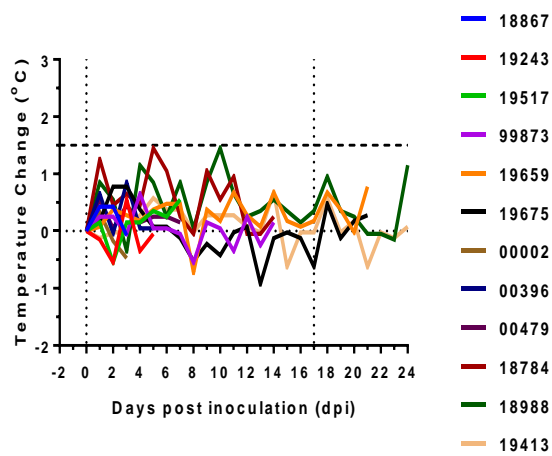

b

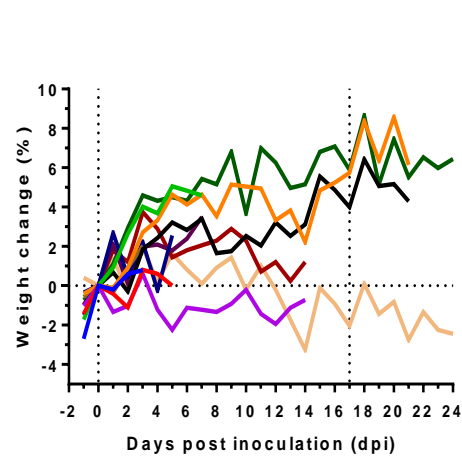

**Figure S2. Clinical data for daily temperature and weight monitoring.** Recorded (a) temperature (°C), as an absolute change from baseline during the acclimatization period and (b) weight, as a percentage change from baseline at time of inoculation. Parameters remained within the normal range and did not exceed the mild limit for any clinical signs including temperature (+1.5°C increase from baseline) or weight (10% decrease in weight from 0dpi) for the duration of the study.
